# Supplementary material
Source: publisher site journal article supplement (https://www.dovepress.com/article/234385)
Supplement: Supplementary file 1 [file get_supplementary_file.php]

**PRISMA FLOW DIAGRAM FOR LITERATURE REVIEW**

Records excluded

(n=82)

Records included

(n=16)

**Included**

**Eligibility**

Records excluded due to lack of relevance

(n=1412)

Records excluded due to not meeting study criteria

(n=328)

Publications included for full text reviews

(n=98)

Relevant Publications

(n=426)

**Screening**

Publications identified through database search

(n=1838)

**Identification**
